# Supplementary material for: An AlphaFold2 map of the 53BP1 pathway identifies a direct SHLD3–RIF1 interaction critical for shieldin activity
Source: PubMed Central journal article supplement — EMBO Rep. 2023 Jun 12;24(8):e56834. doi: 10.15252/embr.202356834 (PMC10398656; doi:10.15252/embr.202356834), 2023-06-12
Supplement: EMBR-24-e56834-s005.pdf [file EMBR-24-e56834-s005.pdf]

## Expanded View Figures

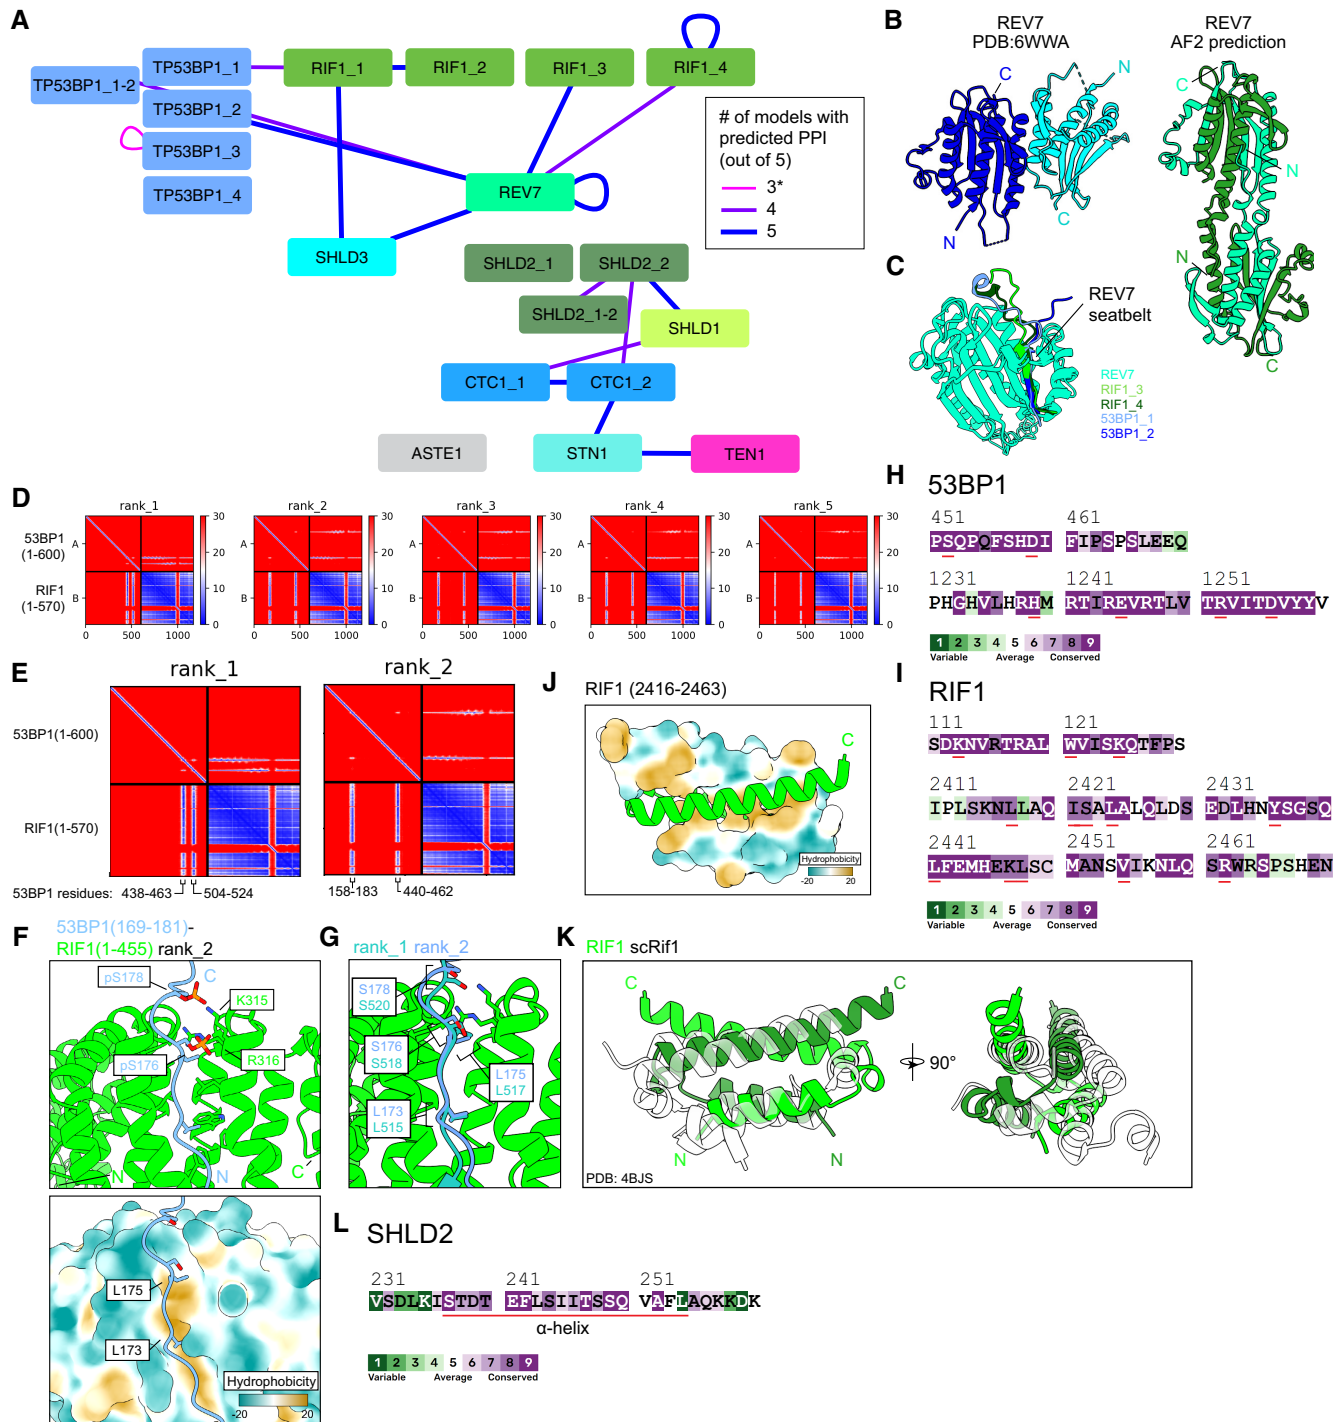

Figure EV1.

**Figure EV1. Data supporting the AlphaFold2-Multimer pairwise matrix screen for protein–protein interactions in the 53BP1-RIF1-shieldin-CST pathway.**

- A Schematic of predictions that meet the cutoff scores of pDockQ > 0.23, interface PAE < 15 Å, and four or more repeated predictions. Nodes are proteins and fragments used for each prediction. Junction nodes are fragments spanning ± 200 residues from where large proteins are divided and are only shown if interactions meeting the score cutoffs are present (e.g., TP53BP1\_1-2). Edges link the two chains used for each prediction. Edge thickness and color correspond to the number of predictions (out of five for each pair) meeting the score cutoffs. \*Self-association of TP53BP1\_3 is shown despite not meeting the ≥ 4 consistent model cutoff due to previous experimental results corroborating the predicted interaction.
- B Comparison of REV7 dimer structures determined from X-ray crystallography (Left, PDB ID: 6WWA) and from AlphaFold2 prediction (right).
- C Superimposition of predicted heterodimeric structures between REV7 and RIF1 fragments 3 and 4 and 53BP1 fragments 1 and 2. See also Appendix Fig S1.
- D PAE plots of the predicted 53BP1 (fragment 1; 1–600) and RIF1 (fragment 1; 1–570), ranked by predicted template model (pTM) scores.
- E Close-ups of two PAE plots from (D), with the 53BP1 regions of high PAE confidence labeled.
- F Predicted structures of the 53BP1-RIF1 interface. Top, phosphate groups modeled onto two serines of 53BP1 whose phosphorylation is known to be essential for interaction with RIF1. Bottom, surface representation of RIF1 colored by hydrophobicity.
- G Superimposition of the 53BP1-RIF1 interface from two different predicted models.
- H ConSurf sequence conservation analysis of the indicated 53BP1 regions. Residues important for the predicted secondary RIF1-53BP1 interface (53BP1 residues 440–462) or 53BP1 oligomerization (53BP1 residues 1,237–1,286) are underlined in red.
- I ConSurf sequence conservation analysis of the indicated RIF1 regions. Residues important for the predicted RIF1 oligomerization (RIF1 residues 2,435–2,464) or the predicted secondary RIF1-53BP1 interface (RIF1 residues 79–169) are underlined in red.
- J Predicted structure of the RIF1 dimerization interface, one monomer is shown with surface representation colored by hydrophobicity.
- K Superimposition of the RIF1 oligomerization domain and the experimentally-determined structure (translucent) of the corresponding region in *S. cerevisiae* Rif1 (PDB ID: 4BJ5).
- L ConSurf sequence conservation analysis of the indicated SHLD2 region. Residues comprising the alpha helix predicted to bind SHLD2 OB-A and OB-B are underlined in red.

**Figure EV2. Data supporting the SHLD3 C terminus as necessary and sufficient for RIF1 binding and recruitment to sites of DNA damage.**

- A Top-ranking model of RIF1 (1–615) and SHLD3 (131–250) colored by pLDDT score.
- B Five AF2-predicted models of RIF1 (1–615) and SHLD3 (131–250) superimposed, aligned by the SHLD3 chain.
- C Top-ranking AF2 model of RIF1 (1–615) and SHLD3 (131–250), highlighting residues associated with SHLD3 DNA binding and RIF1 53BP1 phosphopeptide binding.
- D Scatter plot of interface PAE vs pDockQ scores of AF2-predicted models between RIF1 (1–615) with the indicated paralogues of the SHLD3 eIF4E-like domain. Cutoff scores of 15 Å and 0.23 PAE and pDockQ scores are shown as dotted lines. Models meeting the cutoff are represented as black points and those that do not are represented as gray points.
- E Immunoblot of whole cell extracts of U2OS 2-6-3 cells transfected with plasmids encoding the indicated eGFP-tagged SHLD3. Lysates were probed for eGFP and tubulin (loading control). IB—immunoblot. EV—empty vector.
- F Representative micrographs of the LacR/LacO assay using mCherry-LacR as bait to evaluate chromatin recruitment of eGFP-tagged SHLD3 variants as a control for the experiments using mCherry-LacR-RIF1<sup>N</sup> in Fig 2E and F.
- G Quantification of F. GFP intensities are presented as a ratio between the average fluorescence intensity within the mCherry-labeled LacR focus and the average nuclear intensity. Bars represent mean ( $n = 140, 138, 131, 133$  for eGFP, eGFP-SHLD3, eGFP-SHLD3<sup>N</sup>, eGFP-SHLD3<sup>C</sup> from three biologically independent experiments).
- H Representative micrographs of control experiments for the LacR-FokI assay in Fig 2H and I to evaluate DNA-damage recruitment of eGFP-tagged SHLD3 variants. LacR-FokI expression was not induced, and no mCherry-LacR-FokI or eGFP-SHLD3 foci were detected.
- I Representative micrographs of the LacR-FokI assay to evaluate DNA-damage induction after mCherry-LacR-FokI expression. U2OS 2-6-3 cells were transfected with plasmids encoding eGFP-SHLD3 and treated with 4-hydroxytamoxifen and Shield-1 peptide to induce mCherry-LacR-FokI expression. The cells were then analyzed for  $\gamma$ -H2AX focus formation colocalizing with mCherry-LacR-FokI as a proxy for DNA double-strand break formation through immunofluorescence (top). Colocalization of mCherry-LacR-FokI focus with endogenous RIF1 was also assessed (bottom).
- J Quantification of I. Immunofluorescence intensities are presented as a ratio between the average fluorescence intensity within the mCherry-labeled LacR focus and the average nuclear intensity. Bars represent mean ( $n = 95, 88, 90, 94$  for  $\gamma$ -H2AX eGFP,  $\gamma$ -H2AX eGFP-SHLD3, RIF1 eGFP, RIF1 eGFP-SHLD3 from two biologically independent experiments).

Source data are available online for this figure.

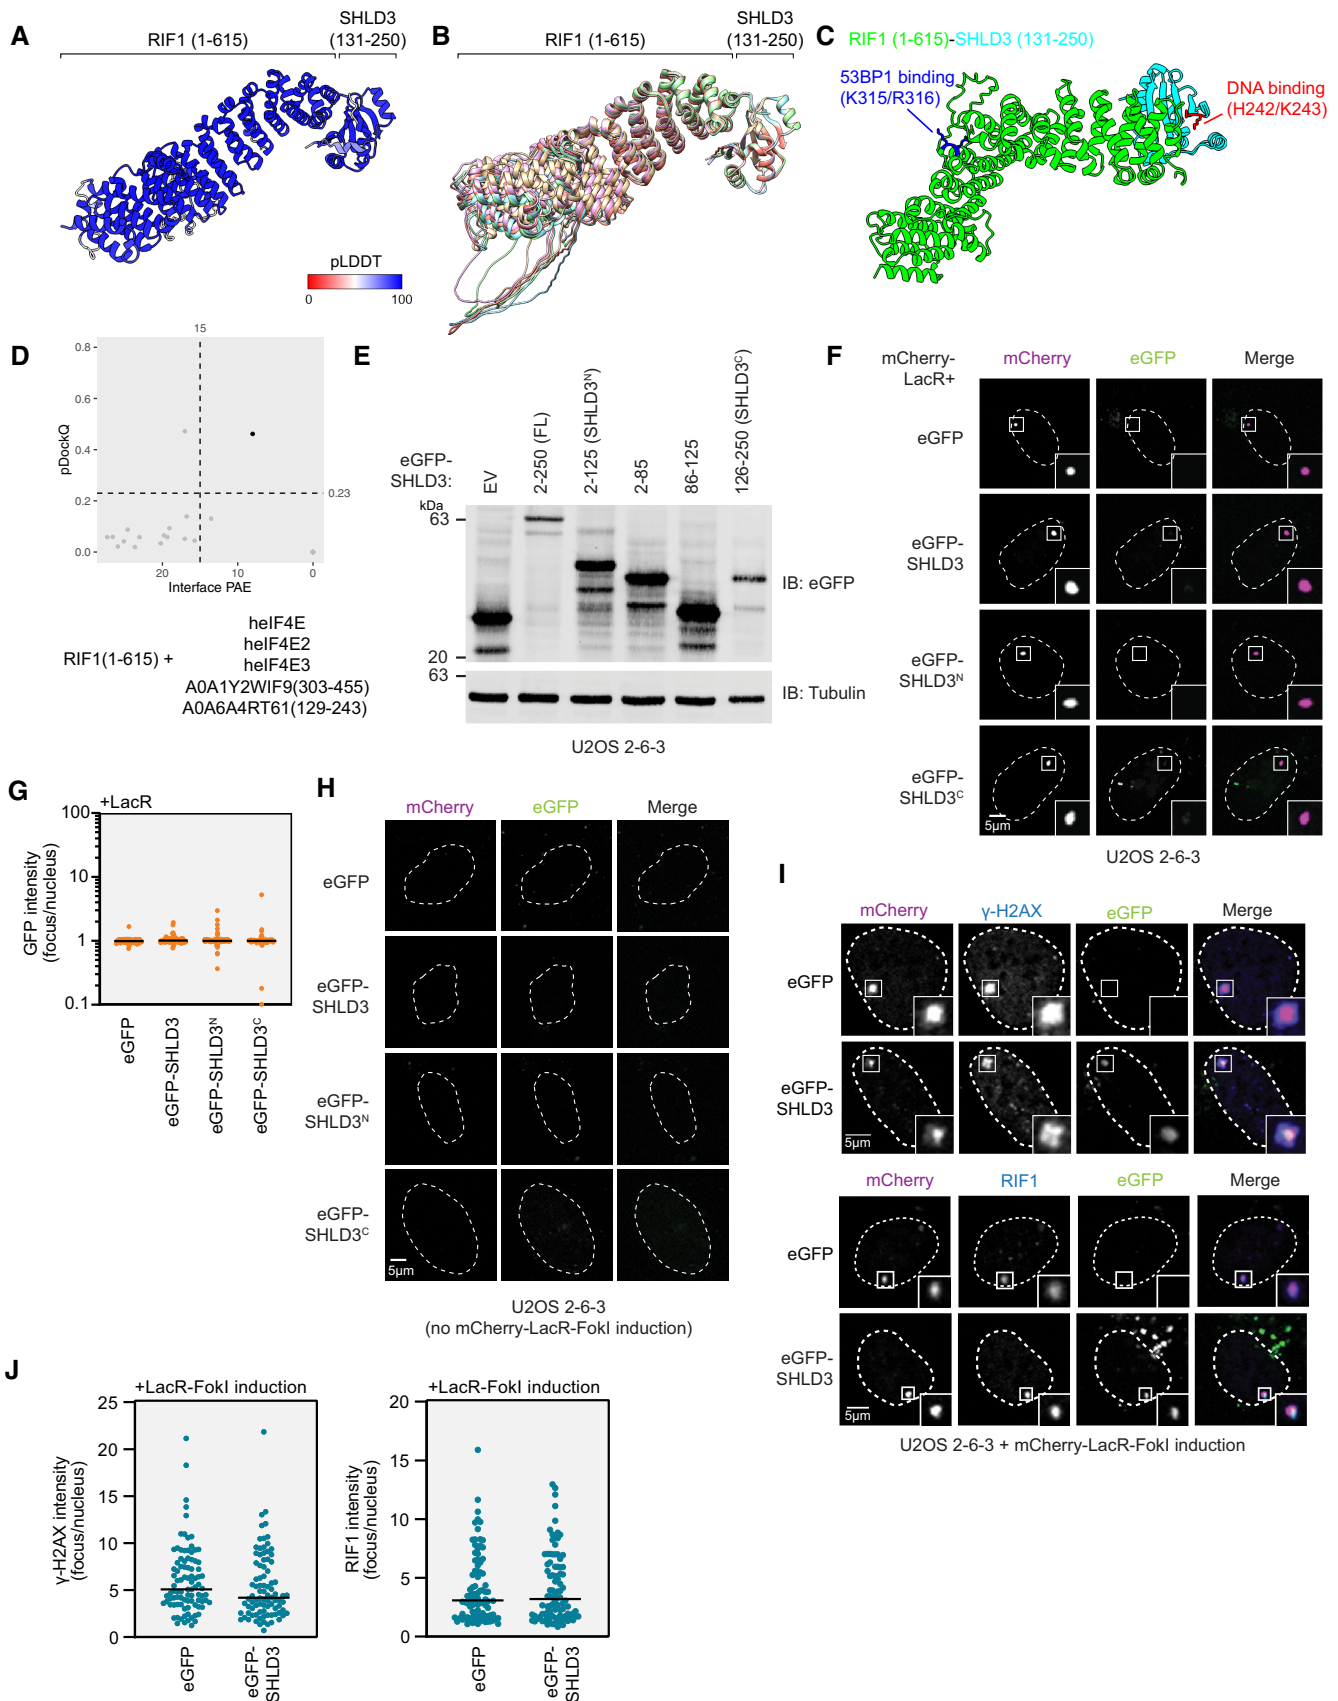

Figure EV2.

**Figure EV3. Data supporting the polar interactions that are essential for SHLD3-RIF1 binding.**

- A Immunoblot of whole cell extracts of U2OS 2-6-3 cells transfected with plasmids encoding the indicated eGFP-tagged SHLD3<sup>C</sup> (residues 126–250) variants. Lysates were probed for eGFP and tubulin (loading control). IB—immunoblot. EV—empty vector. WT—wild-type.
- B Representative micrographs of the LacR/LacO assay using mCherry-LacR-RIF1<sup>N</sup> as bait to evaluate chromatin recruitment of eGFP-tagged SHLD3<sup>C</sup> alanine substitution variants shown in Fig 3C. SHLD3<sup>C</sup>: residues 126–250. RIF1<sup>N</sup>: residues 1–967.
- C Representative micrographs of the LacR-FokI assay to evaluate DNA-damage recruitment of eGFP-tagged SHLD3<sup>C</sup> alanine substitution variants after induction of LacR-FokI expression shown in Fig 3D. SHLD3<sup>C</sup>: residues 126–250.
- D Representative micrographs of the LacR-FokI assay to evaluate DNA-damage recruitment of endogenous RIF1 after induction of LacR-FokI expression in the presence of exogenously expressed eGFP-tagged SHLD3<sup>C</sup> alanine substitution variants. SHLD3<sup>C</sup>: residues 126–250.
- E Quantification of D. RIF1 immunofluorescence intensities are presented as a ratio between the average fluorescence intensity within the mCherry-labeled LacR focus and the average nuclear intensity. Bars represent mean values ( $n = 99, 92, 88, 97, 90, 92, 100$  for EV, WT, S131A, W132A, R166A, N201A, D216A from two biologically independent experiments).
- F Immunoblot of whole cell extracts of U2OS 2-6-3 cells transfected with plasmids encoding the indicated eGFP-tagged SHLD3<sup>C</sup> (residues 126–250) variants. Lysates were probed for eGFP and tubulin (loading control).
- G Representative micrographs of the LacR/LacO assay using mCherry-LacR-RIF1<sup>N</sup> as bait to evaluate chromatin recruitment of eGFP-tagged SHLD3 H242A/K243A.
- H Quantification of G. GFP intensities are presented as a ratio between the average fluorescence intensity within the mCherry-labeled LacR-RIF1<sup>N</sup> focus and the average nuclear intensity. Bars represent mean values ( $n = 127, 129, 136$  for EV, WT, H242A/K243A from three biologically independent experiments). Analysis was performed using the Kruskal–Wallis test followed by Dunn's multiple comparisons against empty vector control. \*\*\*\* $P < 0.0001$ .
- I Immunoblot of whole cell extracts of RPE SHLD3-KO cells stably transduced with lentivirus encoding the indicated 3xFLAG-tagged SHLD3 alanine substitution variants. Lysates were probed for FLAG and tubulin (loading control). IB—immunoblot.
- J Immunoblot of whole cell extracts of complemented RPE SHLD3-KO cells shown in (I) that were transfected with plasmid encoding eGFP-SHLD2. Lysates were probed for eGFP and tubulin (loading control).

Source data are available online for this figure.

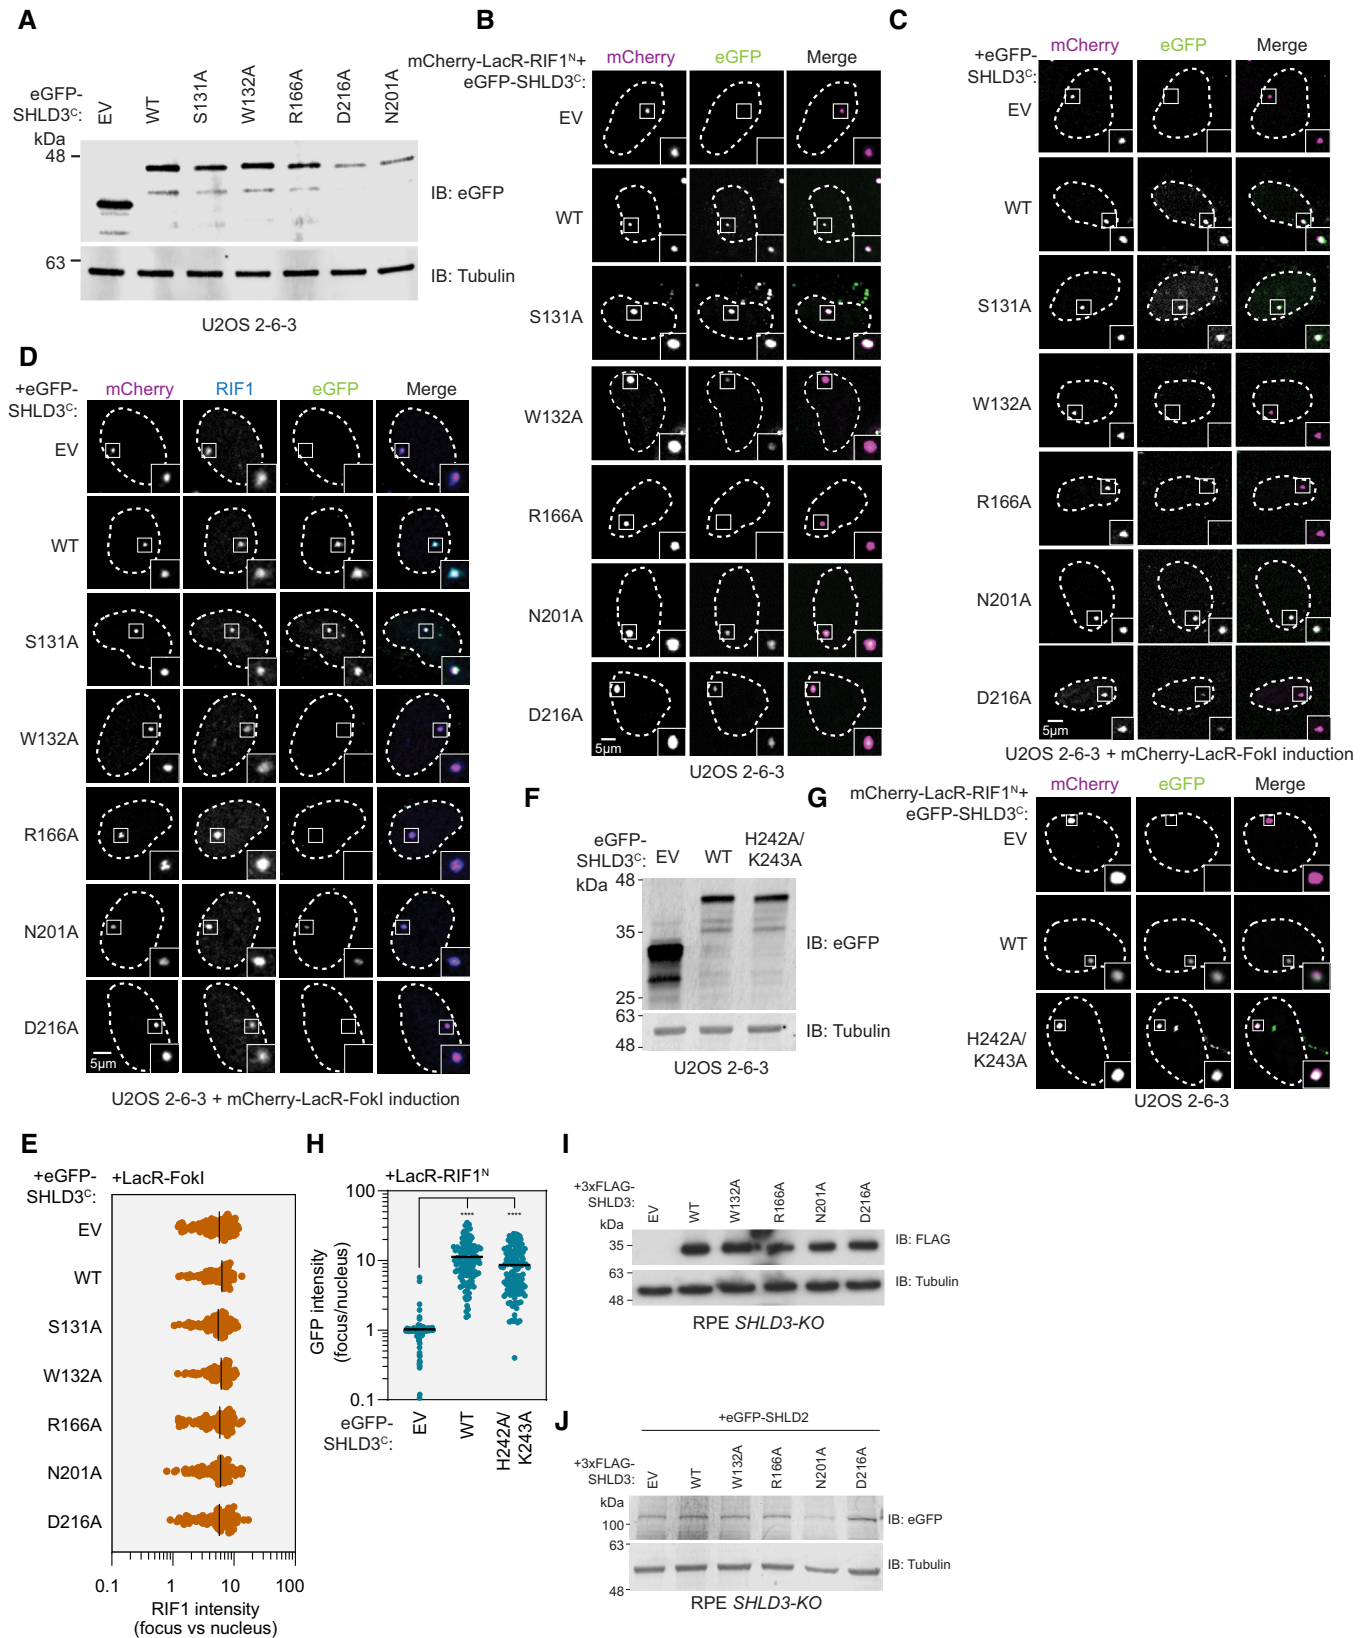

Figure EV3.

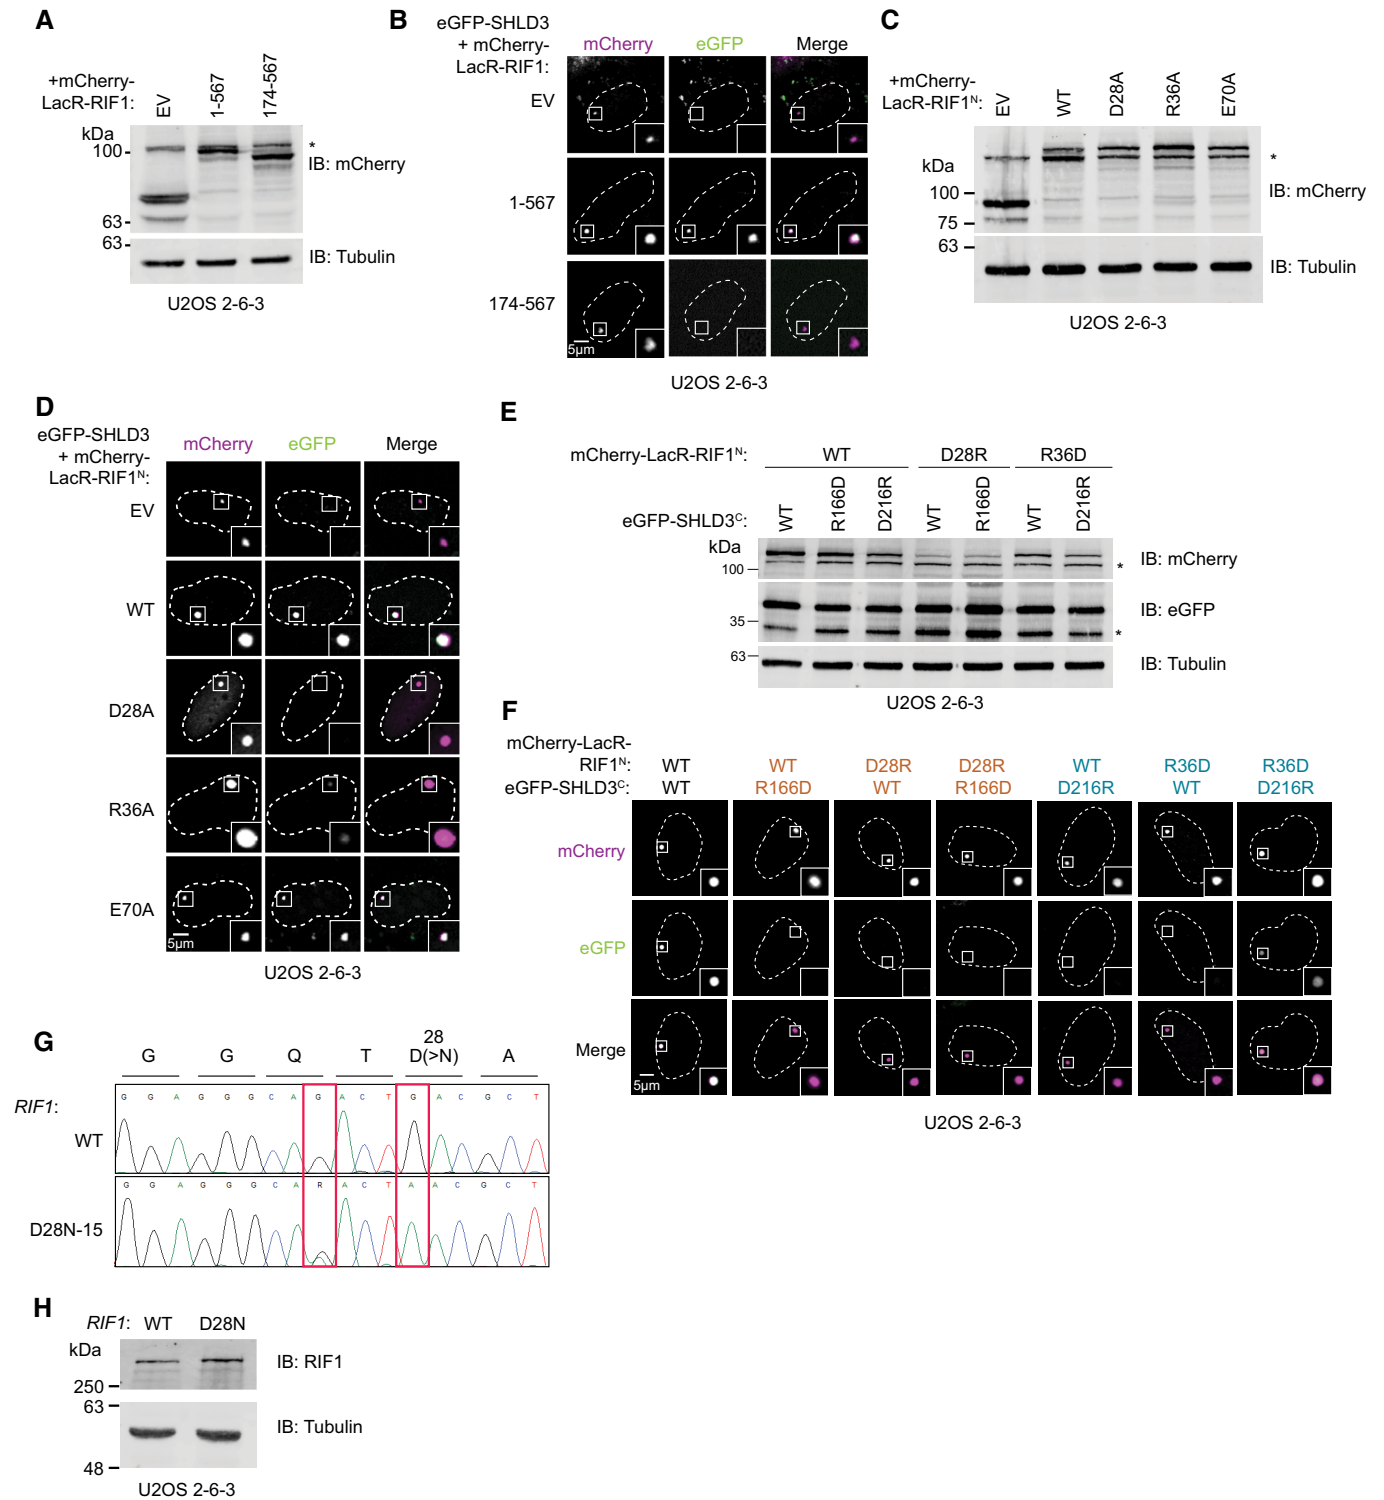

Figure EV4.

**Figure EV4. Data supporting the extreme N terminus of RIF1 binding SHLD3 through polar residues.**

- A Immunoblot of whole cell extracts of U2OS 2-6-3 cells transfected with plasmids encoding the indicated mCherry-LacR-fused RIF1 truncations. Lysates were probed for mCherry and tubulin (loading control). IB: immunoblot, EV: empty vector. \*: nonspecific band.
- B Representative micrographs (of three biologically independent experiments) of the LacR/LacO assay using the indicated mCherry-LacR-fused RIF1 variants to evaluate their ability to recruit eGFP-SHLD3 to chromatin shown in Fig 5A.
- C Immunoblot of whole cell extracts of U2OS 2-6-3 cells transfected with plasmids encoding the indicated mCherry-LacR-fused RIF1<sup>N</sup> (residues 1–967) alanine variants. Lysates were probed for mCherry and tubulin (loading control). \*: nonspecific band.
- D Representative micrographs (of three biologically independent experiments) of the LacR/LacO assay using the indicated mCherry-LacR-fused RIF1<sup>N</sup> variants to evaluate their ability to recruit eGFP-SHLD3 to chromatin shown in Fig 5B. WT: wild-type.
- E Immunoblot of whole cell extracts of U2OS 2-6-3 cells transfected with plasmids encoding the indicated mCherry-LacR-RIF1<sup>N</sup> and eGFP-SHLD3<sup>C</sup> variants. Lysates were probed for mCherry, eGFP, and tubulin (loading control). \*: nonspecific band.
- F Representative micrographs of the LacR/LacO assay using the indicated mCherry-LacR-RIF1<sup>N</sup> and eGFP-SHLD3<sup>C</sup> variants to evaluate their colocalization at LacO arrays shown in Fig 5D.
- G Sanger sequencing chromatograms of PCR products amplified from U2OS 2-6-3 cells with and without subjecting it to base editing to introduce endogenous D28N mutations. A single clone was isolated that contained the desired mutation (D28N-15). Red boxes highlight induced mutations. The first heterozygous G > A mutation is silent. The second homozygous G > A mutation results in the desired D28N substitution.
- H Immunoblot of whole cell extracts of U2OS 2-6-3 cells with or without base editing to introduce endogenous D28N mutation. Lysates were probed for RIF1 and tubulin (loading control).

Source data are available online for this figure.

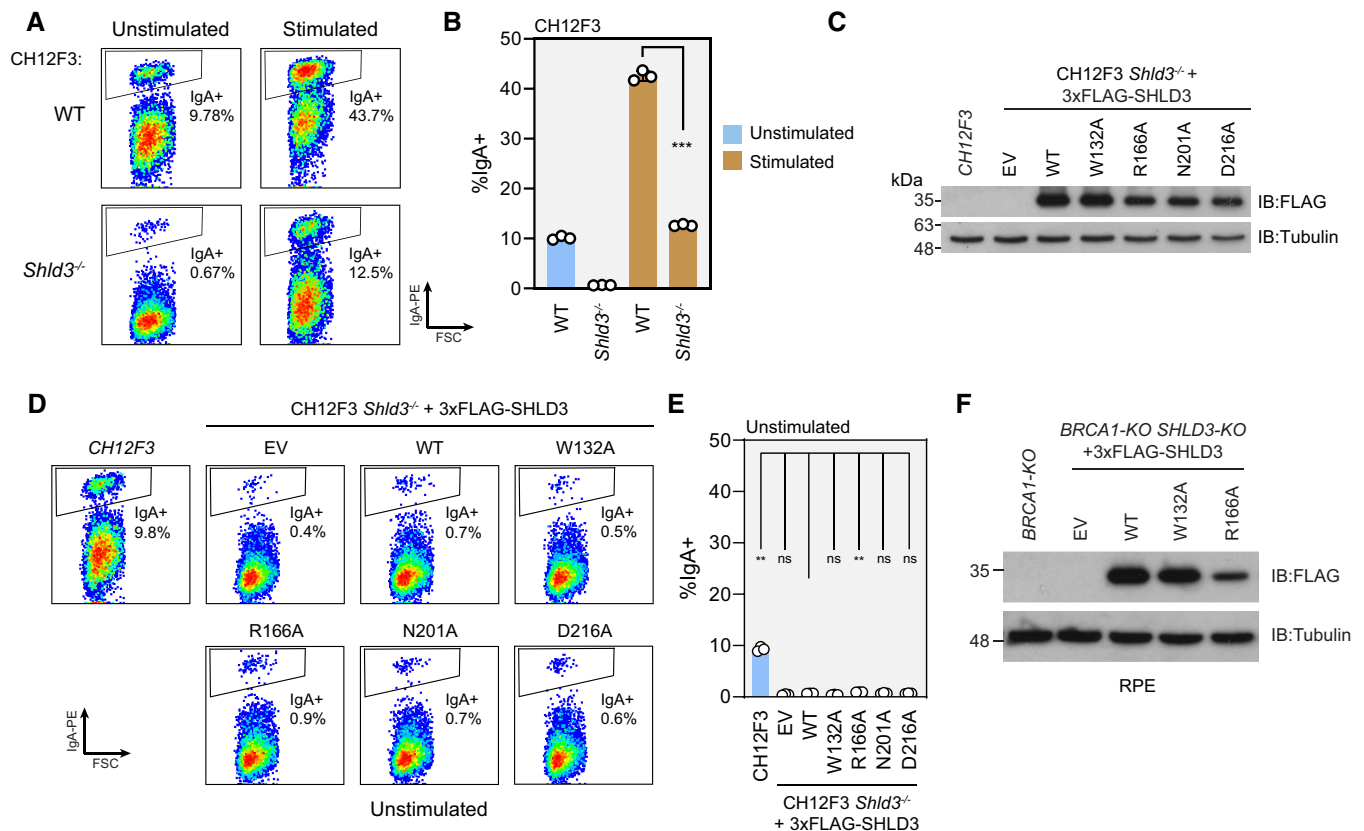

Figure EV5.

**Figure EV5. Data supporting the importance of SHLD3-RIF1 binding for shieldin activity.**

- A Representative flow cytometry density plots measuring IgA expression in unstimulated and stimulated CH12F3 wild-type or *Shld3*<sup>-/-</sup> cells. Values shown are %IgA<sup>+</sup> cells. FSC: forward scatter. WT—wild-type.
- B Quantification of class switch recombination data shown in (A). Bars represent mean ± s.d., *n* = 3 biologically independent experiments. Analysis was performed using the Welch's two-tailed *t*-test. \*\*\**P* = 0.0002.
- C Immunoblot of whole cell extracts of CH12F3 *Shld3*<sup>-/-</sup> cells stably transduced with lentivirus encoding the indicated FLAG-tagged SHLD3 alanine substitution variants. Lysates were probed for FLAG and tubulin (loading control). IB—immunoblot. EV—empty vector.
- D Representative flow cytometry density plots measuring IgA expression in unstimulated CH12F3 wild-type or *Shld3*<sup>-/-</sup> cells stably transduced with lentivirus encoding FLAG-tagged SHLD3 alanine substitution variants. Control experiment for Fig 6B. Values shown are %IgA<sup>+</sup> cells.
- E Quantification of class switch recombination data shown in (D). Bars represent mean ± s.d., *n* = 3 biologically independent experiments. Analysis was performed using the Dunnett's multiple comparisons test compared against *Shld3*<sup>-/-</sup> cells complemented with wild-type SHLD3. \*\**P* < 0.01, <sup>ns</sup>*P* > 0.05.
- F Immunoblot of whole cell extracts of RPE *BRCA1-KO SHLD3-KO* cells stably transduced with lentivirus encoding the indicated FLAG-tagged SHLD3 alanine substitution variants. Lysates were probed for FLAG and tubulin (loading control).

Source data are available online for this figure.
