# Supplementary material for: An AlphaFold2 map of the 53BP1 pathway identifies a direct SHLD3–RIF1 interaction critical for shieldin activity
Source: PubMed Central journal article supplement — EMBO Rep. 2023 Jun 12;24(8):e56834. doi: 10.15252/embr.202356834 (PMC10398656; doi:10.15252/embr.202356834), 2023-06-12
Supplement: EMBR-24-e56834-s008.pdf [file EMBR-24-e56834-s008.pdf]

## **Appendix**

### **An AlphaFold 2 map of the 53BP1 pathway identifies a direct SHLD3-RIF1 interaction critical for shieldin activity**

Chérine Sifri, Lisa Hoeg, Daniel Durocher, and Dheva Setiাপutra

#### **Table of Contents**

**Appendix Figure S1.** AF2 prediction of 53BP1 and RIF1 association with the REV7 seatbelt in the presence of SHLD3.....2

**Appendix Figure S2.** Analysis of AF2-predicted shieldin-CST structures.....4

**A**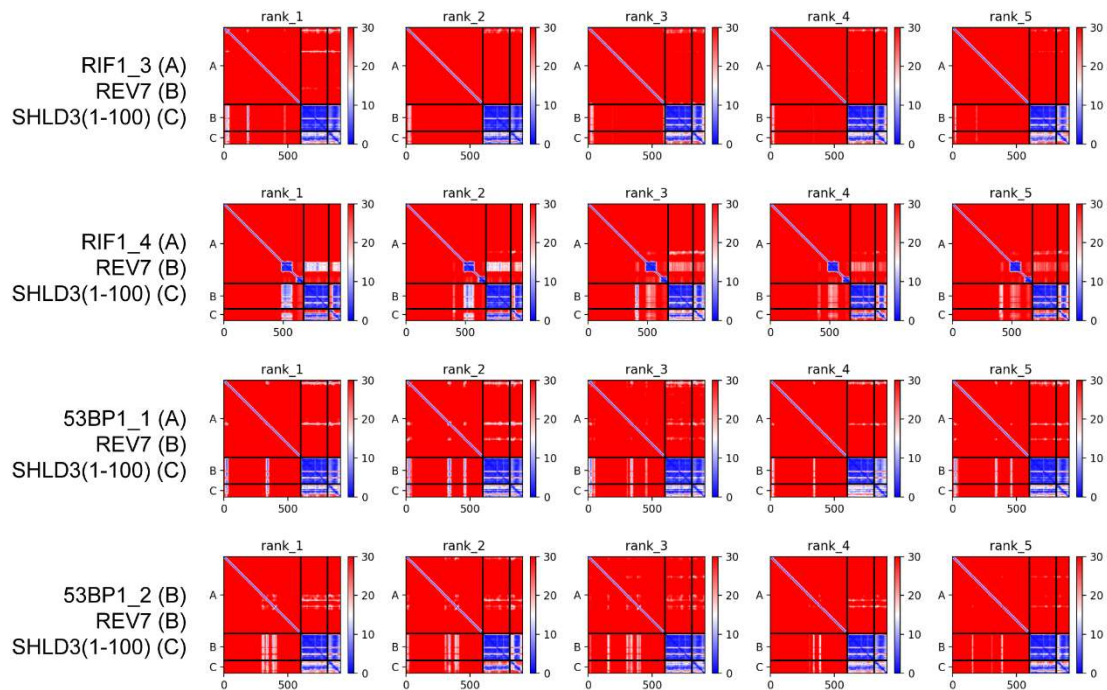**B**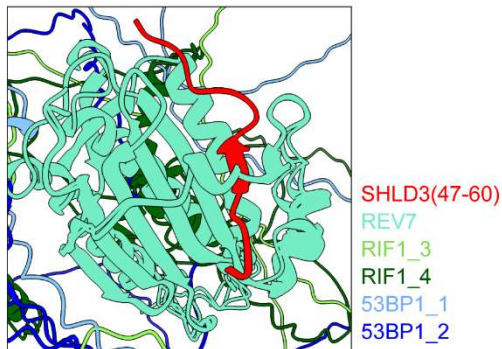

**Appendix Figure S1. AF2 prediction of 53BP1 and RIF1 association with the REV7 seatbelt in the presence of SHLD3.**

A. Predicted aligned error plots of the indicated fragments ranked by predicted template model (pTM) scores. Each prediction corresponds to Fig EV1C except with the addition of SHLD3 residues 1-100.

B. Superimposition of predicted heterotrimeric structures between REV7, SHLD3(1-100), and RIF1 fragments 3 and 4 and 53BP1 fragments 1 and 2. Only rank\_1 models are shown. See also [Fig EV1C](#).

# Appendix Figure S2

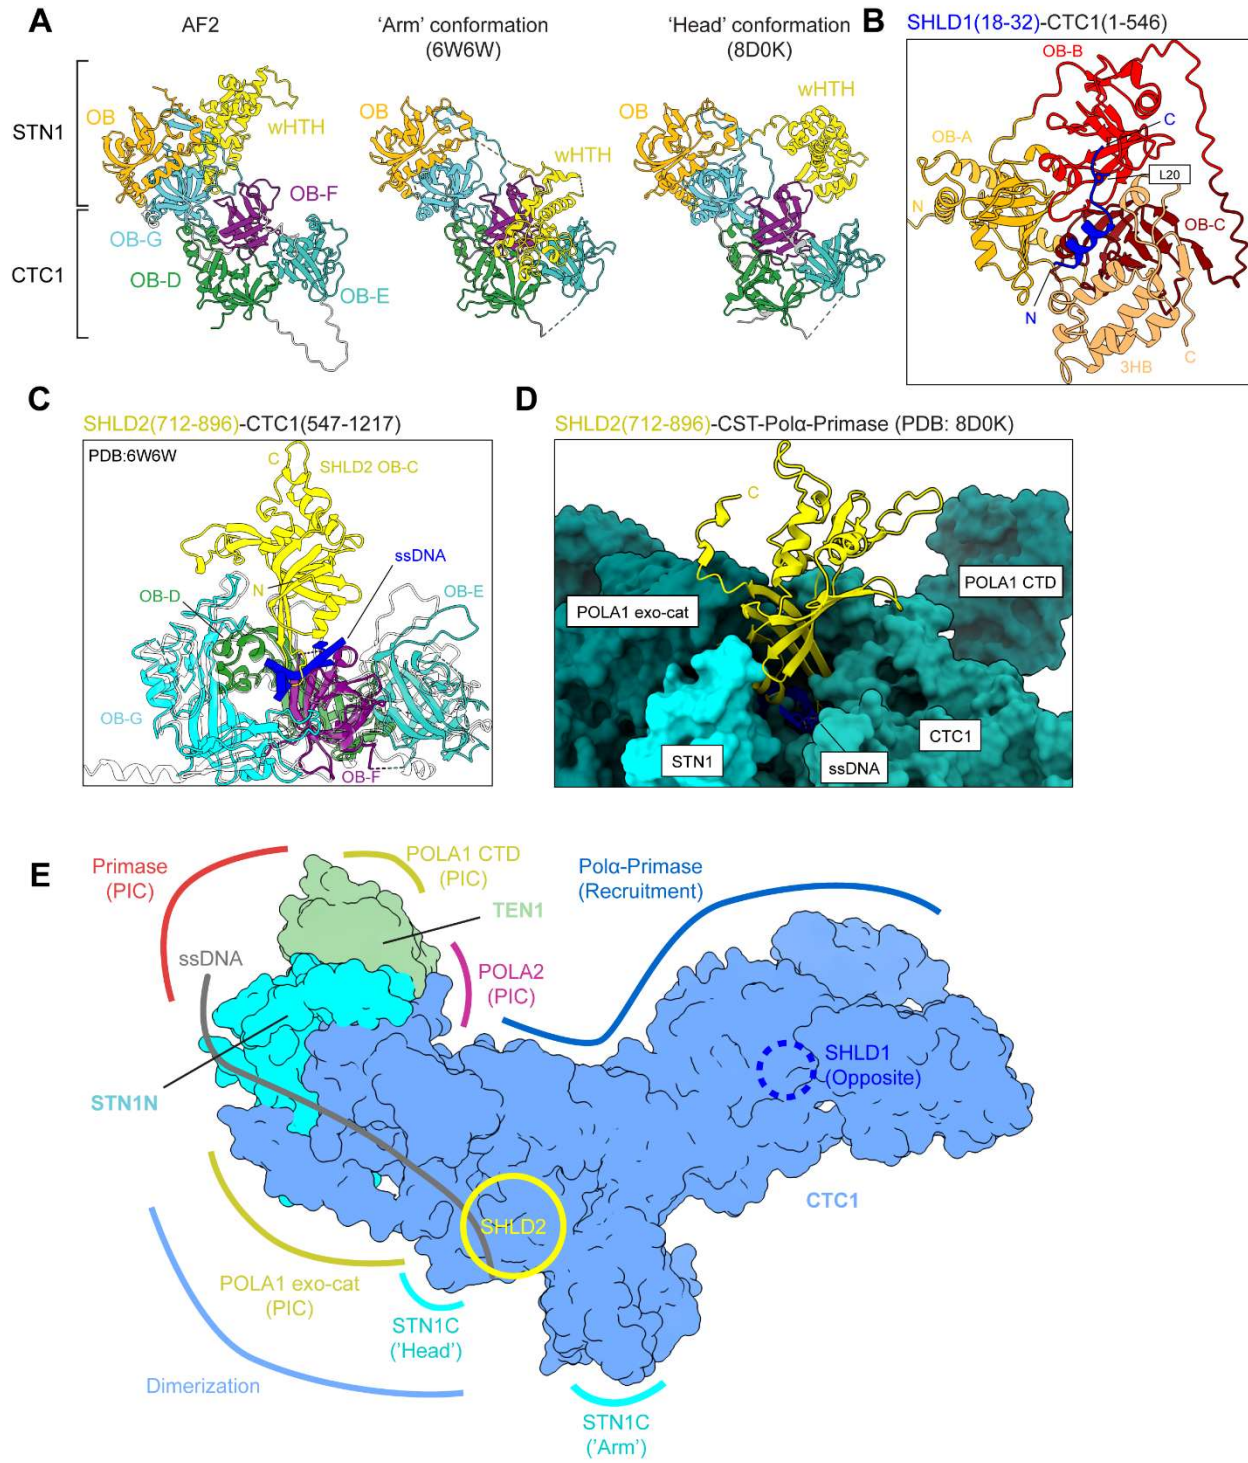

## Appendix Fig S2. Analysis of AF2-predicted shieldin-CST structures.

- A. Comparison of the AF2-predicted CTC1-STN1 structure with experimentally determined structures of CST in the ‘Arm’ and ‘Head’ conformations (PDB: 6W6W and 8D0K, respectively). Structures are aligned through the CTC1 subunit.
- B. Alternative view of the AF2-predicted SHLD1-CTC1 structure (Fig 1B panel vii) with the individual CTC1 domains (three-helix bundle 3HB, OB-A, OB-B, and OB-C) labeled.
- C. Superimposition of the AF2-predicted SHLD2-CTC1 structure with the experimentally determined structure of CST (PDB: 6W6W; translucent) showing steric incompatibility with CTC1-bound single-stranded DNA (ssDNA).
- D. Superimposition of the AF2-predicted SHLD2-CTC1 structure with the experimentally determined structure of CST-Pol  $\alpha$ -Primase in the PIC conformation (PDB: 8D0K, surface representation) showing that the SHLD2 binding interface is not mutually exclusive with POLA1 exo-cat domain.
- E. Schematic of the AF2 predicted SHLD2 and SHLD1 binding sites (circles) on the experimentally determined structure of CTC1, STN1 N-terminal half (STN1N), and TEN1 (PDB: 8D0K; surface representation). The approximate binding interfaces of other CST-Pol  $\alpha$ -Primase subunits are shown (PDB: 6W6W and 8D0K for PIC and recruitment conformations, respectively). SHLD1 interface is on the opposite face of the displayed model.
